# Supplementary material
Source: PubMed Central journal article supplement (PMC5031359)
Supplement: NIHMS794428-supplement-data_supplement_one.pdf [file NIHMS794428-supplement-data_supplement_one.pdf]

**Data Supplement S1.** Performance by site of the simple keyword search in classification of suspicion for KD compared to manual tagging by the two physician reviewers of Emergency Department clinical notes.

| Sites                     | Sensitivity (%)       | Specificity (%)       |
|---------------------------|-----------------------|-----------------------|
| Site 1*                   | 44.0<br>(34.7-53.4)   | 68.4<br>(56.4- 80.5)  |
| Site 2                    | 35.9<br>(24.2- 47.7)  | 95.7<br>(87.3-100.0)  |
| Sites 1 and 2<br>combined | 41.0<br>(33.7 - 48.4) | 76.3<br>(66.9 - 85.6) |

\* % (CI)
