# Supplementary material
Source: PubMed Central journal article supplement (PMC5031359)
Supplement: NIHMS794428-supplement-data_supplement_two.pdf [file NIHMS794428-supplement-data_supplement_two.pdf]

**Data Supplement S2.** Performance of KD-NLP and simple keyword search in identification of individual KD clinical criteria.

| <b>KD signs</b>          |                | <b>Sensitivity<br/>95% CI</b> | <b>Specificity<br/>95% CI</b> |
|--------------------------|----------------|-------------------------------|-------------------------------|
| FEVER                    | Keyword search | 100.0<br>100.0-100.0          | 100.0<br>100.0-100.0          |
|                          | KD-NLP         | 100.0<br>100.0-100.0          | 100.0<br>100.0-100.0          |
| EXTREMITY_CHANGES        | Keyword search | 4.8<br>0.7-9.0                | 98.0<br>95.7-100.0            |
|                          | KD-NLP         | 68.9<br>60.0-77.9             | 80.7<br>74.4-87.0             |
| POLYMORPHOUS_EXANTHEMA   | Keyword search | 100.0<br>100.0-100.0          | 3.8<br>0.0-8.9                |
|                          | KD-NLP         | 99.0<br>97.6-100.0            | 32.1<br>19.5-44.6             |
| ORAL_CHANGES             | Keyword search | 56.5<br>48.7-64.3             | 76.8<br>68.5-85.1             |
|                          | KD-NLP         | 88.3<br>83.2-93.4             | 84.9<br>77.8-91.9             |
| CONJUNCTIVAL_INJECTION   | Keyword search | 64.6<br>57.5-71.7             | 79.5<br>70.5-88.5             |
|                          | KD-NLP         | 97.7<br>95.5-99.9             | 93.6<br>88.2-99.0             |
| CERVICAL_LYMPHADENOPATHY | Keyword search | 31.8<br>23.6-39.9             | 75.6<br>68.1-83.1             |
|                          | KD-NLP         | 96.8<br>93.8-99.9             | 78.0<br>70.7-85.2             |
